# Supplementary material for: Predicting turbidity and Aluminum in drinking water treatment plants using Hybrid Network (GA- ANN) and GEP
Source: Copernicus journal article supplement (doi:10.5194/dwes-2021-8), 2021-03-31
Supplement: Supplementary file [file dwes-2021-8-AC8-supplement.pdf]

Dear editorial board and referee

The data used were tests taken during the time of the study.

According to the recent situation, there is no daily records, but as the fact that the model is not a time series model, so it does not affect the results. Moreover, the records were just acceptable and enough.

I could mention that this model works for conventional plants that use the following methods, coagulation, flocculation, sedimentation and filtration. As this is the situation in our plant.

As some plants don't use a coagulants, like here in Syria , the plant of Sin river in Latakia .

I can provide a figure of the data for turbidity or other parameters. Or a frequent figure like the following.

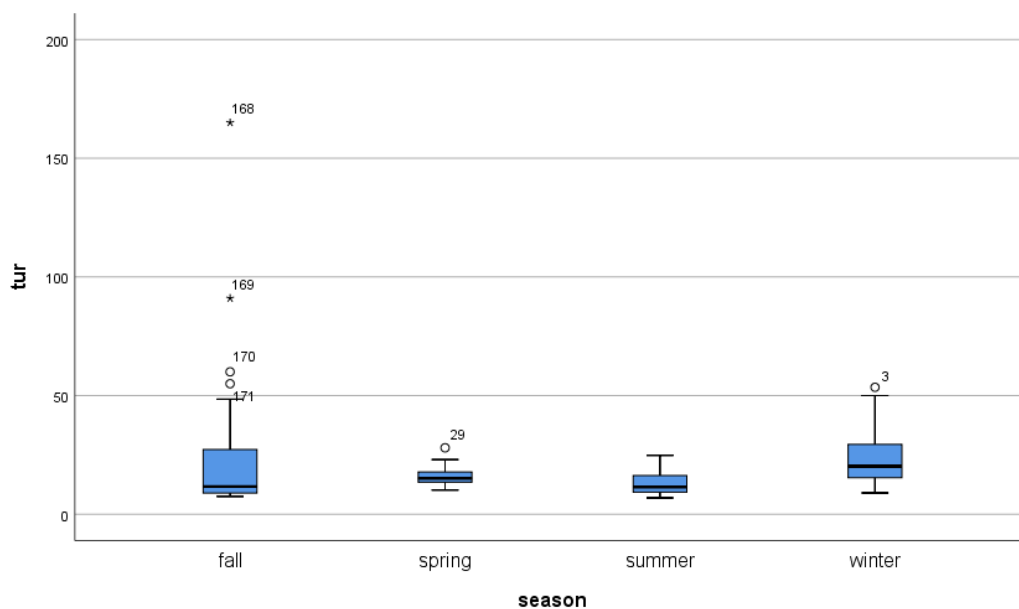

Thanks for your time and notices.
