# Supplementary material for: Predicting turbidity and Aluminum in drinking water treatment plants using Hybrid Network (GA- ANN) and GEP
Source: Copernicus journal article supplement (doi:10.5194/dwes-2021-8), 2021-03-31

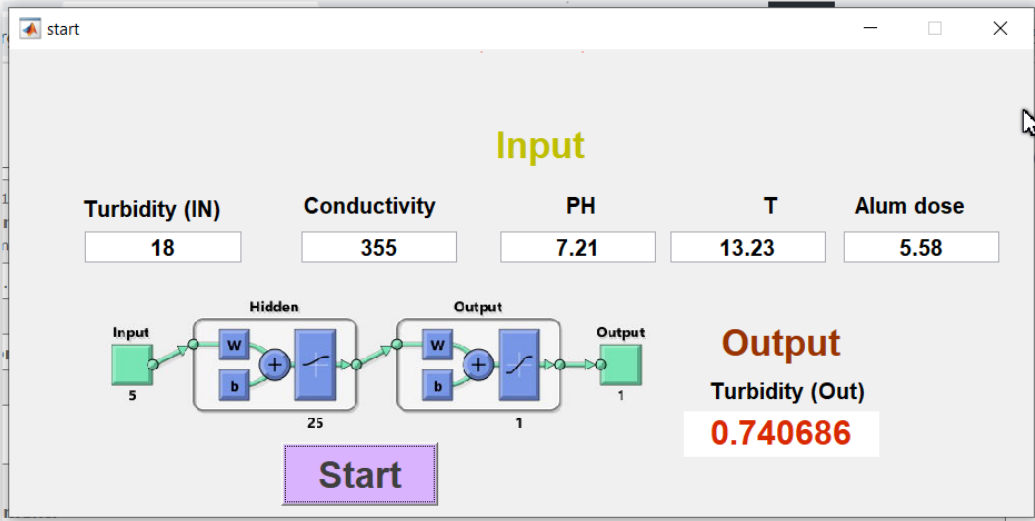

Supplement: Supplementary file [file dwes-2021-8-CC10-supplement.pdf]
